# Supplementary material for: Novel real-time PCR based assays for differentiating fall armyworm strains using four single nucleotide polymorphisms
Source: PeerJ journal article supplement (doi:10.7717/peerj.12195), 2021-09-24

# SNP D

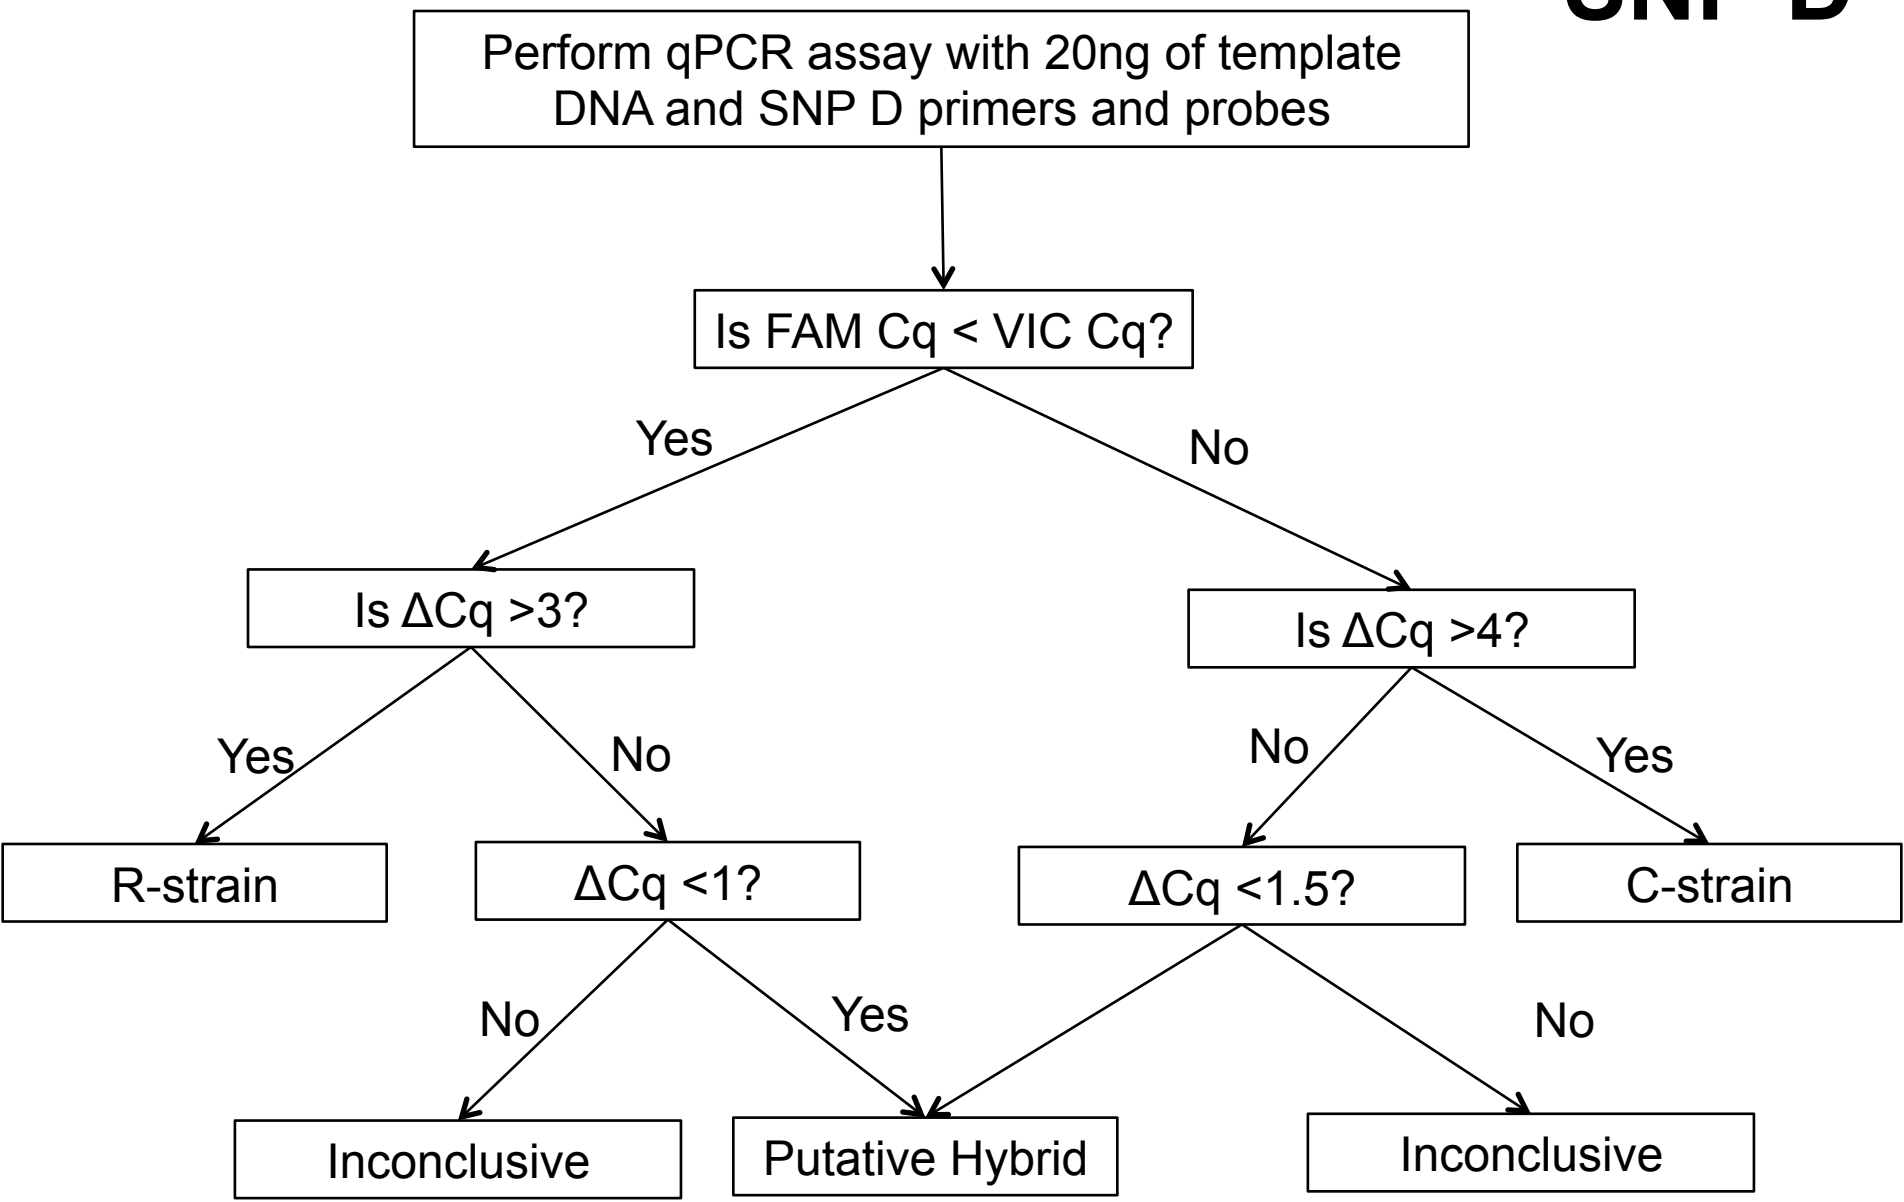

Supplement: Figure_S4.pdf [file Figure_S4.pdf]
