# Supplementary material for: Novel real-time PCR based assays for differentiating fall armyworm strains using four single nucleotide polymorphisms
Source: PeerJ. 2021 Sep 24;9:e12195. doi: 10.7717/peerj.12195 (PMC8475543; doi:10.7717/peerj.12195)
Supplement: Supplemental Information 1 [file peerj-09-12195-s001.xlsx]

## Sheet: Table_S1
Table S1.ThermoFisher Custom SNP Genotyping Assay ID and amplicon context sequence for each assay used in this study.
Assay	ThermoFisher Assay ID	Context Sequence
SNP A	ANEP2UM	TTTCCCATCTGATGCTAGACCAAAA[A/G]GACTCATCTAACCGCGAACGGCTTG
SNP B	ANFVWEJ	TCATCNTGTGGCCTNGGAACATACG[G/C]TACTGCGGAACTGTAAACAAAAATT
SNP C	ANAAHJC	GCATTGATGTGCTGGATGGCTGGCT[C/T]TGGTAGCGGTCTGTAACGCTCCGGC
SNP D	ANH6JJE	CAACAGCTATCTTCTGTGAGGAGTA[C/G]GACATGAGCTGGGTNTTCACCAGCT
