# Supplementary material for: Novel real-time PCR based assays for differentiating fall armyworm strains using four single nucleotide polymorphisms
Source: PeerJ. 2021 Sep 24;9:e12195. doi: 10.7717/peerj.12195 (PMC8475543; doi:10.7717/peerj.12195)
Supplement: Supplemental Information 2 — The R-strain allele is associated with the FAM-bound probe, while the C-strain allele is associated with the VIC-bound probe. All listed values were averaged across two technical replicates with SEM included. NF indicate that no flourescents was detected above the threshold for one or more technical replicates. Δ Cq could not be calculated when NF was recorded in either allele. [file peerj-09-12195-s002.xlsx]

## Sheet: Table_S2
Table S2. Real-time PCR data for SNP A including the RFUs detected and Cq value calculated for each flourophore. The R-strain allele is associated with the FAM-bound probe, while the C-strain allele is associated with the VIC-bound probe. All listed values were averaged across two technical replicates with SEM included. NF indicate that no flourescents was detected above the threshold for one or …
Sample	Strain Call	Mean FAM RFUs ± SEM	Mean VIC RFUs ± SEM	Mean FAM Cq ± SEM	Mean VIC Cq ± SEM	ΔCq
CC-2	R-strain	2729.5±88.5	169±17	21.42±0.17	NF	N/A
CC-3	R-strain	2686±33	36.85±9.45	21.85±0.24	NF	N/A
CSTX-1	R-strain	2427.5±8.5	87.55±50.45	21.94±0.2	NF	N/A
CSTX-10	R-strain	2854.5±45.5	41.4±4.2	21.54±0.05	NF	N/A
CSTX-11	R-strain	2166±87	97.15±66.85	22.33±0.09	NF	N/A
CSTX-12	R-strain	2478±244	41.1±3.8	21.75±0.35	NF	N/A
CSTX-18	R-strain	1073±67	137.75±77.25	23.75±0.39	NF	N/A
CSTX-2	R-strain	2442±88	90.25±56.75	21.69±0.06	NF	N/A
CSTX-21	R-strain	2777.5±109.5	46.15±0.95	22.04±0.07	NF	N/A
CSTX-23	R-strain	2959.5±55.5	417±54	21.62±0.03	NF	N/A
CSTX-24	R-strain	2801.5±6.5	43.55±3.55	21.36±0.04	NF	N/A
CSTX-29	R-strain	2468±87	42.25±1.65	21.96±0.18	NF	N/A
CSTX-3	R-strain	1113.5±54.5	66.55±25.35	23.95±0.07	NF	N/A
CSTX-32	R-strain	2367.5±18.5	49.7±0.2	22.29±0.09	NF	N/A
CSTX-35	R-strain	2446±45	402±1	21.78±0.11	NF	N/A
CSTX-38	R-strain	2511±15	34.15±1.75	22±0.04	NF	N/A
CSTX-39	R-strain	2612±96	39.1±2.2	20.9±0.32	NF	N/A
CSTX-4	R-strain	2459±46	111.15±63.85	22.52±0.1	NF	N/A
CSTX-40	R-strain	4045±141	314.5±7.5	21.25±0.23	NF	N/A
CSTX-5	R-strain	2695.5±61.5	47.2±1.5	22.56±0.05	NF	N/A
CSTX-6	R-strain	2970.5±1.5	50.4±1.4	21.6±0.06	NF	N/A
CSTX-7	R-strain	2858±120	96.8±53.2	21.44±0.03	NF	N/A
CSTX-8	R-strain	2965±154	86.05±42.95	21.36±0.16	NF	N/A
CSTX-9	R-strain	2855.5±10.5	106.6±64.4	21.82±0.38	NF	N/A
GA-1	R-strain	2317±83	75.85±26.15	24.08±0.42	NF	N/A
GA-10	R-strain	2790.5±34.5	49.65±3.85	23.01±0.14	NF	N/A
GA-2	R-strain	2557.5±8.5	53.55±2.05	22.59±0.08	NF	N/A
GA-3	R-strain	2492±132	50.85±6.65	22.9±0.16	NF	N/A
GA-4	R-strain	4345±220	372±46	21.89±0.12	NF	N/A
GA-5	R-strain	4929±105	465.5±25.5	21.17±0.03	NF	N/A
GA-6	R-strain	2703±37	53.85±6.95	22.65±0.01	NF	N/A
GA-7	R-strain	2835.5±129.5	49.3±6.4	22.59±0.05	NF	N/A
GA-8	R-strain	2228.5±34.5	49.65±2.85	23.22±0.09	NF	N/A
GA-9	R-strain	2761±20	104.5±51.5	22.58±0.16	NF	N/A
MD-1	R-strain	2333.5±42.5	51.7±1.6	23.88±0.19	NF	N/A
MD-2	R-strain	983±2	36.8±7.1	26.98±0.07	NF	N/A
MD-3	R-strain	2148.5±73.5	109.8±58.2	24.7±0.23	NF	N/A
MD-5	R-strain	1893.5±83.5	44.05±2.45	25.05±0.03	NF	N/A
MD-6	R-strain	2119.5±161.5	39.3±1.8	24.2±0.08	NF	N/A
MD-9	R-strain	2136±16	40.8±6.3	24.08±0.14	NF	N/A
NC-1	R-strain	1377.5±30.5	319.5±20.5	31.59±0.07	NF	N/A
NC-2	R-strain	2636±27	42.45±7.35	23.37±0.03	NF	N/A
NC-3	R-strain	2227.5±29.5	53.9±0.3	27.45±0.11	NF	N/A
NC-5	R-strain	4571.5±154.5	377.5±24.5	22.73±0.03	NF	N/A
NC-6	R-strain	2497.5±24.5	49.8±2.5	23.23±0.12	NF	N/A
SC-10	R-strain	2418±54	41.25±3.05	23.11±0.16	NF	N/A
SC-9	R-strain	2358.5±78.5	91.25±45.75	23.2±0.08	NF	N/A
WES-1	R-strain	2782.5±18.5	38.1±5.1	22.51±0.03	NF	N/A
WES-2	R-strain	2429.5±15.5	44.05±0.15	23.29±0.15	NF	N/A
WES-3	R-strain	2478.5±46.5	39.05±0.45	22.91±0.07	NF	N/A
CC-4	C-strain	217±8	6138±3	29.85±0.11	22.38±0.22	7.47
CC-5	C-strain	233.5±3.5	6195±58	29.17±0.1	22.42±0.05	6.75
CSTX-13	C-strain	210±3	6279.5±182.5	30.28±0.07	22.26±0.03	8.02
CSTX-14	C-strain	267±4	5983±79	27.63±0.6	22.47±0	5.16
CSTX-15	C-strain	237.5±37.5	6064±38	28.61±1.71	22.66±0.07	5.95
CSTX-16	C-strain	243.5±5.5	6002±17	29.39±0.07	22.84±0.19	6.55
CSTX-17	C-strain	256±22	6102±52	29±1.21	22.44±0.11	6.56
CSTX-19	C-strain	279±18	6311.5±89.5	28.52±1.11	22.48±0	6.04
CSTX-20	C-strain	261±4	6248±98	29.18±0.22	22.61±0.15	6.57
CSTX-22	C-strain	253.5±7.5	6889±31	28.78±0.01	22.32±0.04	6.46
CSTX-25	C-strain	225±9	6853.5±205.5	30.18±0.5	22.85±0.01	7.33
CSTX-26	C-strain	247.5±23.5	6204.5±314.5	29.8±0.6	22.39±0.05	7.41
CSTX-27	C-strain	235±9	6461.5±165.5	30.5±0.55	22.69±0.01	7.81
CSTX-28	C-strain	221±9	6002±27	30.32±0.43	24.05±0.23	6.27
CSTX-30	C-strain	205±6	5819.5±106.5	31.22±0.25	23.53±0.06	7.69
CSTX-31	C-strain	233.5±29.5	6177.5±28.5	29.6±1.67	22.49±0.06	7.11
CSTX-33	C-strain	216.5±18.5	6049±40	29.89±0.88	22.49±0	7.4
CSTX-34	C-strain	242.5±33.5	6038±176	28.87±1.61	22.6±0.03	6.27
CSTX-36	C-strain	221±1	5971.5±58.5	29.77±0.16	22.52±0.04	7.25
CSTX-41	C-strain	214.5±12.5	6105±133	29.89±0.35	22.08±0.01	7.81
CSTX-42	C-strain	237.5±16.5	5992±135	29.27±1.03	22.58±0.09	6.69
FL-1	C-strain	183.5±20.5	6124.5±53.5	33.18±0.78	26.48±0.05	6.7
FL-2	C-strain	211.5±2.5	6208.5±108.5	32.09±0.18	25.38±0.04	6.71
FL-3	C-strain	179.75±22.66	6043.25±191.08	31.95±0.51	25.24±0.02	6.71
FL-4	C-strain	222.5±13.5	6546.5±116.5	32.06±0.79	25.75±0.05	6.31
FL-5	C-strain	214±11	6313±55	N/A	26.27±0.07	N/A
FL-6	C-strain	207±4	7322.5±88.5	32.77±0.14	25.79±0.1	6.98
FL-7	C-strain	226±13	6730±136	31.6±0.16	26.17±0.07	5.43
FL-8	C-strain	176.5±6.5	6767.5±56.5	35.05±0.52	27.49±0.07	7.56
FL-9	C-strain	214.5±20.5	6748.5±327.5	32.59±0.43	25.04±0.07	7.55
LBB-1	C-strain	222±17	6695.5±30.5	30.8±0.34	22.74±0.24	8.06
LBB-2	C-strain	243±26	5962±187	29.1±1.29	22.59±0.02	6.51
LBB-3	C-strain	212.5±15.5	6278.5±197.5	31.06±0.06	22.66±0.06	8.4
LBB-4	C-strain	233.5±3.5	5982.5±71.5	29.74±0.29	22.59±0.02	7.15
LBB-5	C-strain	188±21	5445.5±289.5	31.4±1.11	22.74±0.08	8.66
LBB-6	C-strain	226.5±21.5	5964.5±74.5	30.51±1.6	22.76±0	7.75
LBB-8	C-strain	200.5±17.5	6169.5±80.5	31.67±0.32	23.76±0.04	7.91
LBB-9	C-strain	217±5	6124±54	30.87±0.17	23.64±0.17	7.23
MD-4	C-strain	201±34	5953±128	31.85±3.02	26.75±0	5.1
MD-7	C-strain	202±45	6536.5±105.5	31.82±2.44	24.34±0.13	7.48
MD-8	C-strain	156.5±2.5	6126±82	33.92±0.11	25.74±0.19	8.18
MN-1	C-strain	226±10	6539±359	30.64±0.04	22.48±0.19	8.16
MN-2	C-strain	237.5±14.5	6444.5±325.5	31.32±0.69	22.78±0.22	8.54
MN-3	C-strain	236±15	7144±151	29.38±0.55	22.46±0.07	6.92
MN-4	C-strain	275±15	6955±121	28.51±0.05	22.46±0.03	6.05
MN-5	C-strain	250.5±7.5	7156.5±323.5	30.27±0.1	22.65±0.04	7.62
MN-7	C-strain	228±40	6140±136	29.76±1.96	23.27±0.11	6.49
MN-8	C-strain	220±5	5891.5±52.5	30.06±0.17	23.55±0.05	6.51
NC-4	C-strain	231.5±0.5	6924±25	31.39±0.31	25.64±0.02	5.75
NC-7	C-strain	227.5±2.5	6417.5±31.5	31.74±0.2	24.78±0.01	6.96
NC-8	C-strain	188.5±2.5	5586.5±55.5	34.73±0.2	29.09±0.21	5.64
SC-1	C-strain	217±12	6806±87	32.02±0.09	25.2±0.06	6.82
SC-2	C-strain	203.5±27.5	6285±55	31.33±1.17	24.6±0.03	6.73
SC-4	C-strain	231.5±4.5	6284±7	30.56±0.04	23.94±0.04	6.62
SC-5	C-strain	203.5±17.5	5923±356	31.57±0.38	23.69±0.06	7.88
SC-6	C-strain	257±20	6024±58	32.33±1.05	24.22±0.03	8.11
SC-8	C-strain	217.5±25.5	6157±346	32.04±0.98	24.41±0.03	7.63
CC-1	Heterozygote	2026±5	6316±27	23±0.26	24.03±0.18	1.03
CSTX-37	Heterozygote	2060.5±46.5	6583.5±140.5	22.97±0.21	23.9±0.23	0.93
LBB-7	Heterozygote	1965±4	6058±42	23.65±0.15	24.68±0.07	1.03
MN-6	Heterozygote	1928±4	5781.5±46.5	23.21±0.05	24.29±0.1	1.08
SC-3	Heterozygote	3300±138	5390.5±193.5	24.26±0.04	26.35±0.09	2.09
SC-7	Heterozygote	3043±1	5011.5±30.5	24.96±0.05	26.96±0.01	2
