# Supplementary material for: Novel real-time PCR based assays for differentiating fall armyworm strains using four single nucleotide polymorphisms
Source: PeerJ. 2021 Sep 24;9:e12195. doi: 10.7717/peerj.12195 (PMC8475543; doi:10.7717/peerj.12195)
Supplement: Supplemental Information 3 — The R-strain allele is associated with the FAM-bound probe, while the C-strain allele is associated with the VIC-bound probe. All listed values were averaged across two technical replicates with SEM included. NF indicate that no flourescents was detected above the threshold for one or more technical replicates. Δ Cq could not be calculated if NF was recorded in either allele. [file peerj-09-12195-s003.xlsx]

## Sheet: Table_S3
Table S3. Real-time PCR data for SNP B including the RFUs detected and Cq value calculated for each flourophore. The R-strain allele is associated with the FAM-bound probe, while the C-strain allele is associated with the VIC-bound probe. All listed values were averaged across two technical replicates with SEM included. NF indicate that no flourescents was detected above the threshold for one or …
Sample	Strain Call	Mean FAM RFUs ± SEM	Mean VIC RFUs ± SEM	Mean FAM Cq ± SEM	Mean VIC Cq ± SEM	ΔCq
CC-2	R-strain	8035±280	394±19	21.45±0.09	35.72±0.41	14.27
CC-3	R-strain	7031±42	307±12	21.96±0.14	39.03±0.84	17.07
CSTX-1	R-strain	6787.5±37.5	323.5±8.5	22.39±0.21	38.59±0.49	16.2
CSTX-10	R-strain	7214±39	299±10	22.45±0.19	39.56±0.42	17.11
CSTX-11	R-strain	7389±56	322.5±5.5	21.6±0.03	38.46±0.16	16.86
CSTX-12	R-strain	6892±524	295.5±31.5	21.37±0.05	NF	16.4
CSTX-18	R-strain	6690±142	294±8	21.73±0.26	39.68±0.69	17.95
CSTX-2	R-strain	7085.5±204.5	314±12	22.4±0.25	38.96±0.63	16.56
CSTX-21	R-strain	7726.5±278.5	375±14	22.82±0.2	36.59±0.53	13.77
CSTX-23	R-strain	7535±279	420±35	21.54±0.04	35.34±1.09	13.8
CSTX-24	R-strain	7157.5±24.5	326±2	21.4±0.1	38.31±0.2	16.91
CSTX-29	R-strain	6962±90	305±23	21.48±0.04	39.2±1.17	17.72
CSTX-3	R-strain	6973±424	296±31	21.9±0.12	NF	N/A
CSTX-32	R-strain	5022±60	197.5±1.5	22.22±0.02	NF	N/A
CSTX-35	R-strain	7963±690	445.5±20.5	21.47±0.1	34.6±0.63	13.13
CSTX-38	R-strain	7553±3	331.5±7.5	21.2±0.06	38.03±0.27	16.83
CSTX-39	R-strain	6956.5±20.5	303±12	22.24±0.09	39.25±0.61	17.01
CSTX-4	R-strain	6983.5±53.5	299±2	22.27±0.04	39.89±0.1	17.62
CSTX-5	R-strain	7479.5±118.5	348±2	21.47±0.05	37.38±0.02	15.91
CSTX-6	R-strain	8025.5±15.5	334.5±6.5	21.45±0.15	37.82±0.43	16.37
CSTX-7	R-strain	8047±394	371.5±17.5	21.38±0.07	36.53±0.79	15.15
CSTX-8	R-strain	7932.5±32.5	300±16	22.28±0.11	39.55±0.84	17.27
CSTX-9	R-strain	8013.5±79.5	334±19	22.23±0.12	37.84±0.91	15.61
GA-1	R-strain	6328.5±4.5	255.5±19.5	25.14±0.66	NF	N/A
GA-10	R-strain	6731±135	247.5±10.5	24.38±0.05	NF	N/A
GA-2	R-strain	6999.5±283.5	278±0	22.9±0.21	40.69±0.07	17.79
GA-3	R-strain	6513±89	299.5±24.5	22.68±0.06	39.54±1.24	16.86
GA-4	R-strain	6426±189	250.5±10.5	24.3±0.44	NF	N/A
GA-5	R-strain	6601±35	283±21	23.3±0.41	NF	N/A
GA-6	R-strain	6833±105	280±6	22.78±0.15	40.58±0.24	17.8
GA-7	R-strain	6434.5±231.5	267.5±8.5	24.23±0.11	NF	N/A
GA-8	R-strain	7006±130	255±13	24.24±0.01	NF	N/A
GA-9	R-strain	6876±199	288.5±28.5	24.13±0.02	NF	N/A
MD-1	R-strain	5974.5±132.5	241±21	24.43±0.05	NF	N/A
MD-2	R-strain	5050.5±12.5	147.5±8.5	27.74±0.29	NF	N/A
MD-3	R-strain	5226.5±69.5	205.5±3.5	26.21±0.04	NF	N/A
MD-5	R-strain	3913±112	133.5±3.5	28.15±0.07	NF	N/A
MD-6	R-strain	5091.5±251.5	56.6±0.4	24.85±0.38	NF	N/A
MD-9	R-strain	5032±265	174.5±13.5	27.27±0.83	NF	N/A
NC-1	R-strain	3465.5±146.5	392.5±95.5	32.68±0.13	39.21±1.18	6.53
NC-2	R-strain	6603.5±290.5	242±28	24.11±0.21	NF	N/A
NC-3	R-strain	5218.5±161.5	185±5	29.31±0.09	NF	N/A
NC-5	R-strain	7037±9	263±11	23.99±0.26	NF	N/A
NC-6	R-strain	6883.5±688.5	273.5±12.5	24.43±0.09	NF	N/A
SC-10	R-strain	6414.5±9.5	232.5±19.5	23.95±0.07	NF	N/A
SC-9	R-strain	6174.5±82.5	256.5±10.5	23.49±0.06	NF	N/A
WES-1	R-strain	7323.5±232.5	348.5±17.5	22.41±0.07	37.47±0.76	15.06
WES-2	R-strain	6901±185	286±14	23.93±0.03	40.29±0.68	16.36
WES-3	R-strain	6903±141	318±24	22.21±0.08	38.68±1.19	16.47
CC-4	C-strain	215.5±26.5	6555±109	N/A	21.69±0.06	N/A
CC-5	C-strain	156.8±81.2	6425.5±72.5	N/A	21.42±0.05	N/A
CSTX-13	C-strain	237.5±5.5	6893.5±83.5	38.19±0.83	21.08±0	17.11
CSTX-14	C-strain	250.5±10.5	6568±155	38.03±0.91	21.16±0.01	16.87
CSTX-15	C-strain	217±8	6832±68	39.76±0.38	21.23±0.01	18.53
CSTX-16	C-strain	221.5±9.5	6406±106	39.44±0.77	21.68±0.08	17.76
CSTX-19	C-strain	264±28	7076±561	37.18±1.26	21.34±0.13	15.84
CSTX-20	C-strain	247.5±8.5	6387±267	37.4±0.57	21.19±0.06	16.21
CSTX-22	C-strain	242.5±13.5	7131±125	38.07±0.73	21.01±0.07	17.06
CSTX-25	C-strain	219.5±5.5	6797±350	39.6±0.15	21.79±0.16	17.81
CSTX-26	C-strain	205±4	6111±177	40.48±0.36	21.43±0.1	19.05
CSTX-27	C-strain	229.5±4.5	6786±37	38.97±0.11	21.45±0.07	17.52
CSTX-28	C-strain	232±2	6394.5±12.5	39.01±0.46	21.53±0.13	17.48
CSTX-30	C-strain	183.5±0.5	6202.5±163.5	N/A	22.44±0.06	N/A
CSTX-31	C-strain	176.5±23.5	6458±250	N/A	21.27±0	N/A
CSTX-33	C-strain	201±18	6611.5±46.5	N/A	21.19±0.04	N/A
CSTX-34	C-strain	224.5±1.5	6426±67	39.33±0.06	21.35±0.03	17.98
CSTX-36	C-strain	146.75±72.25	6610±244	N/A	21.74±0.45	N/A
CSTX-37	C-strain	339.5±12.5	6682.5±179.5	35.43±0.57	23.15±0.03	12.28
CSTX-40	C-strain	215±7	6064±170	40.06±0.43	22.31±0.04	17.75
CSTX-41	C-strain	203±17	6360±158	N/A	21.43±0.07	N/A
CSTX-42	C-strain	191±24	6474.5±321.5	N/A	21.31±0.04	N/A
FL-1	C-strain	192±16	6076.5±53.5	N/A	25.24±0.08	N/A
FL-2	C-strain	180.5±6.5	6118±65	N/A	24.41±0.02	N/A
FL-3	C-strain	155±9	5727±57	N/A	24.48±0.01	N/A
FL-4	C-strain	175±24	6640.5±96.5	N/A	24.86±0.04	N/A
FL-5	C-strain	2394.5±335.5	5542±98	27.81±0.5	26.56±0.23	1.25
FL-6	C-strain	188.5±1.5	6799±331	N/A	24.79±0.06	N/A
FL-8	C-strain	201±40	6696±93	39.03±0	26.57±0.21	12.46
FL-9	C-strain	229±19	6981.5±75.5	39.01±0.7	24.12±0.02	14.89
LBB-1	C-strain	224±10	7178±273	39.91±0.32	21.47±0.09	18.44
LBB-2	C-strain	242.5±24.5	6638.5±240.5	38.12±1.02	21.26±0	16.86
LBB-3	C-strain	190.5±0.5	6552.5±64.5	N/A	21.33±0.05	N/A
LBB-4	C-strain	204.5±10.5	6198±104	N/A	21.25±0.03	N/A
LBB-5	C-strain	207±24	6150±388	N/A	21.39±0.08	N/A
LBB-6	C-strain	231.5±29.5	6395.5±139.5	39.21±1.27	21.59±0.03	17.62
LBB-7	C-strain	231±3	6559.5±44.5	38.79±0.1	22.66±0.01	16.13
LBB-8	C-strain	198.5±3.5	6383.5±77.5	N/A	22.31±0.16	N/A
LBB-9	C-strain	198±7	6297±101	N/A	22.39±0.03	N/A
MD-4	C-strain	121.4±71.6	4756±35	N/A	26.18±0.1	N/A
MD-7	C-strain	150.5±20.5	5839±46	N/A	24.05±0.24	N/A
MD-8	C-strain	1124.5±111.5	4648.5±3.5	29.42±0.31	26.29±0	3.13
MN-1	C-strain	170±42	7011±236	N/A	21.32±0.01	N/A
MN-2	C-strain	234±1	6889.5±195.5	38.68±0.11	22.1±0.45	16.58
MN-3	C-strain	204±5	7867±188	39.49±0.3	21.29±0.1	18.2
MN-4	C-strain	230±21	6997.5±510.5	38.65±1.19	21.33±0.12	17.32
MN-5	C-strain	216.5±17.5	7484.5±472.5	39.61±1.33	21.7±0.09	17.91
MN-7	C-strain	208±2	6544±126	40.32±0.05	22.2±0.03	18.12
MN-8	C-strain	199.5±2.5	6180±6	40.85±0.14	22.23±0.15	18.62
NC-4	C-strain	199.5±2.5	6555±136	N/A	25.13±0.06	N/A
NC-7	C-strain	179±0	6296.5±17.5	N/A	24.07±0.03	N/A
NC-8	C-strain	139.5±19.5	5426±338	N/A	28.65±0.01	N/A
SC-1	C-strain	204±2	6905.5±173.5	40.71±0.03	24.37±0.02	16.34
SC-2	C-strain	190±19	6537±202	N/A	23.78±0.1	N/A
SC-3	C-strain	174±22	6519±215	N/A	24.34±0.05	N/A
SC-4	C-strain	200±8	6404±252	39.73±0.24	22.98±0.01	16.75
SC-5	C-strain	183.5±26.5	6268.5±452.5	N/A	22.64±0.11	N/A
SC-6	C-strain	219.5±10.5	6383.5±132.5	39.89±0.17	23.2±0.05	16.69
SC-7	C-strain	172.5±5.5	6208.5±237.5	N/A	24.98±0.08	N/A
SC-8	C-strain	215.5±13.5	6235.5±142.5	40.02±0.77	23.51±0.09	16.51
CC-1	Heterozygote	5150±309	5725±341	22.08±0.08	22.44±0.09	0.36
CSTX-17	Heterozygote	4683±150	5089.5±110.5	21.78±0.07	22.22±0.05	0.44
FL-7	Heterozygote	4396±37	4690±30	25.67±0.02	26.16±0	0.49
MN-6	Heterozygote	4654.5±336.5	4735.5±320.5	23.07±0.19	23.49±0.19	0.42
