# Supplementary material for: Novel real-time PCR based assays for differentiating fall armyworm strains using four single nucleotide polymorphisms
Source: PeerJ. 2021 Sep 24;9:e12195. doi: 10.7717/peerj.12195 (PMC8475543; doi:10.7717/peerj.12195)
Supplement: Supplemental Information 4 — The R-strain allele is associated with the FAM-bound probe, while the C-strain allele is associated with the VIC-bound probe. All listed values were averaged across two technical replicates with SEM included. NF indicate that no flourescents was detected above the threshold for one or more technical replicates. Δ Cq could not be calculated when NF was recorded in either allele. [file peerj-09-12195-s004.xlsx]

## Sheet: Table_S4
Table S4. Real-time PCR data for SNP C including the RFUs detected and Cq value calculated for each flourophore. The R-strain allele is associated with the FAM-bound probe, while the C-strain allele is associated with the VIC-bound probe. All listed values were averaged across two technical replicates with SEM included. NF indicate that no flourescents was detected above the threshold for one or …
Sample	Strain Call	Mean FAM RFUs ± SEM	Mean VIC RFUs ± SEM	Mean FAM Cq ± SEM	Mean VIC Cq ± SEM	ΔCq
CC-2	R-strain	9107.5±179.5	1758.5±2.5	22.27±0.11	31.48±0.1	9.21
CC-3	R-strain	7960±223	1433±32	22.64±0.03	32.89±0.17	10.25
CSTX-1	R-strain	8002.5±130.5	1525±48	22.14±0.08	32.2±0.27	10.06
CSTX-10	R-strain	8444±127	1521.5±27.5	22.21±0.06	32.36±0.16	10.15
CSTX-11	R-strain	8190±324	1451±131	22.29±0.05	33.06±0.84	10.77
CSTX-12	R-strain	7887±690	1443.5±123.5	22.15±0.16	32.73±0.55	10.58
CSTX-18	R-strain	7926±127	1517.5±14.5	21.81±0.03	32.08±0.13	10.27
CSTX-2	R-strain	8053±252	1463±31	22.1±0.03	32.53±0.13	10.43
CSTX-21	R-strain	9078±193	1761±53	22.28±0.07	31.44±0.2	9.16
CSTX-23	R-strain	8467±441	1776±76	23.32±0	31.63±0.23	8.31
CSTX-24	R-strain	8295±550	1472±91	22.97±0.17	32.83±0.38	9.86
CSTX-29	R-strain	7825±130	1519.5±66.5	22.02±0.21	32.19±0.41	10.17
CSTX-3	R-strain	8047.5±134.5	1474.5±32.5	22.41±0.09	32.56±0.13	10.15
CSTX-32	R-strain	7830±318	1340.5±44.5	23.2±0.08	33.48±0.18	10.28
CSTX-35	R-strain	9245±732	1924±115	21.76±0.08	30.54±0.28	8.78
CSTX-38	R-strain	8219±272	1587.5±52.5	21.92±0.08	31.94±0.2	10.02
CSTX-39	R-strain	7886±113	1608.5±50.5	21.76±0.02	31.75±0.23	9.99
CSTX-4	R-strain	8255.5±82.5	1417±21	22.86±0	33.04±0.09	10.18
CSTX-40	R-strain	7674.5±78.5	1427±11	22.26±0.04	32.77±0.03	10.51
CSTX-5	R-strain	8817±247	1571.5±146.5	22.31±0.16	32.45±0.95	10.14
CSTX-6	R-strain	8994±302	1519±148	22.2±0.1	32.7±0.91	10.5
CSTX-7	R-strain	8932.5±161.5	1756.5±20.5	22.09±0.02	31.36±0.04	9.27
CSTX-8	R-strain	8619±146	1455±63	22.18±0.03	33.01±0.61	10.83
CSTX-9	R-strain	8852.5±98.5	1710.5±31.5	22.14±0.01	31.59±0.11	9.45
FL-7	R-strain	8849±32	1171±11	25.91±0.03	35.38±0.08	9.47
GA-1	R-strain	8260±151	1035.5±23.5	25.23±0.11	35.78±0.19	10.55
GA-10	R-strain	8664.5±202.5	1127.5±9.5	23.96±0.02	34.96±0.1	11
GA-2	R-strain	8057.5±197.5	1031.5±2.5	24.62±0.23	35.88±0.08	11.26
GA-3	R-strain	7996±334	1264.5±43.5	23.46±0.03	33.97±0.21	10.51
GA-4	R-strain	7980.5±463.5	1224.5±35.5	23.3±0.03	34.16±0.17	10.86
GA-5	R-strain	8056.5±112.5	1310±21	23.17±0.03	33.53±0.11	10.36
GA-6	R-strain	7982±306	1233.5±8.5	23.29±0.01	34.16±0.05	10.87
GA-7	R-strain	8399.5±242.5	1372.5±62.5	23.27±0.1	33.38±0.31	10.11
GA-8	R-strain	8375±290	1266.5±17.5	23.49±0.05	34.24±0.03	10.75
GA-9	R-strain	8025±371	1165±10	24.63±0.13	34.95±0.09	10.32
MD-1	R-strain	7998±193	958.5±0.5	25.63±0.05	36.45±0.04	10.82
MD-2	R-strain	8014±164	727±25	27.03±0.02	38.75±0.29	11.72
MD-3	R-strain	7316±33	1015±27	24.83±0.19	35.85±0.23	11.02
MD-5	R-strain	6963±25	636±1	27.14±0.01	39.74±0	12.6
MD-6	R-strain	7113±414	606±20	27.1±0.01	40.26±0.26	13.16
MD-9	R-strain	7722±132	782±29	26.79±0.06	38.08±0.3	11.29
NC-1	R-strain	5828±217	727±199	33.17±0.07	N/A	N/A
NC-2	R-strain	8441.5±307.5	1054±56	25.42±0.06	35.93±0.34	10.51
NC-3	R-strain	8132±223	796±39	28.82±0.2	38.48±0.33	9.66
NC-5	R-strain	8479±105	1293.5±13.5	23.71±0.01	33.96±0.1	10.25
NC-6	R-strain	8717.5±542.5	1261.5±83.5	24.09±0.12	34.36±0.38	10.27
SC-10	R-strain	7935±62	1124±4	24.29±0.01	35.08±0	10.79
SC-9	R-strain	7622±205	991±35	25.07±0.02	36.29±0.42	11.22
WES-1	R-strain	8362±317	1593±82	22.65±0.09	32.19±0.32	9.54
WES-2	R-strain	7924±8	1275.5±58.5	23.64±0.01	34.26±0.49	10.62
WES-3	R-strain	8046.5±64.5	1321±29	24.36±0.09	34.08±0.16	9.72
CC-4	C-strain	274±3	6881±13	NF	22.2±0.04	N/A
CC-5	C-strain	256.5±7.5	6756.5±150.5	NF	21.83±0.01	N/A
CSTX-13	C-strain	234±39	7095.5±57.5	NF	21.43±0.02	N/A
CSTX-14	C-strain	268.5±0.5	6746±185	NF	21.65±0.04	N/A
CSTX-15	C-strain	300.5±25.5	7200±62	NF	21.55±0.05	N/A
CSTX-16	C-strain	151±16	6242±53	NF	21.95±0.11	N/A
CSTX-17	C-strain	244.5±15.5	7025.5±4.5	NF	21.6±0.06	N/A
CSTX-19	C-strain	299±30	7283.5±492.5	NF	21.6±0.07	N/A
CSTX-20	C-strain	280±6	6825±168	NF	21.64±0.04	N/A
CSTX-22	C-strain	263±28	7394±251	NF	21.45±0.07	N/A
CSTX-25	C-strain	225±19	7032.5±73.5	NF	22.24±0.06	N/A
CSTX-26	C-strain	250.5±43.5	6511.5±34.5	NF	21.88±0.01	N/A
CSTX-27	C-strain	177±6	6411±41	NF	21.76±0.04	N/A
CSTX-28	C-strain	237.5±0.5	6632±15	NF	21.9±0.02	N/A
CSTX-30	C-strain	166±10	5921.5±94.5	NF	23.01±0.15	N/A
CSTX-31	C-strain	231±14	6705.5±129.5	NF	21.7±0	N/A
CSTX-33	C-strain	257±17	6801±181	NF	22.67±0.09	N/A
CSTX-34	C-strain	116±4	6154±45	NF	22.66±0.01	N/A
CSTX-36	C-strain	239.5±12.5	6813±164	NF	21.68±0	N/A
CSTX-41	C-strain	192.5±12.5	6103.5±83.5	NF	21.91±0.05	N/A
CSTX-42	C-strain	220.5±40.5	6808.5±263.5	NF	21.91±0.01	N/A
FL-2	C-strain	200.5±10.5	6743±33	NF	24.63±0.07	N/A
FL-3	C-strain	145.05±75.95	6317±243	NF	24.74±0.09	N/A
FL-6	C-strain	185±4	7669±29	NF	24.95±0.03	N/A
FL-8	C-strain	179±15	7596.5±91.5	NF	26.5±0	N/A
FL-9	C-strain	194.5±15.5	7380±138	NF	24.35±0.01	N/A
LBB-1	C-strain	172±8	6662.5±257.5	NF	22.07±0.15	N/A
LBB-2	C-strain	236±8	6764.5±168.5	NF	21.73±0	N/A
LBB-3	C-strain	251.5±8.5	6787±101	NF	21.84±0.19	N/A
LBB-4	C-strain	277±11	6665.5±225.5	NF	21.59±0.02	N/A
LBB-5	C-strain	187.5±0.5	5806.5±342.5	NF	21.92±0.1	N/A
LBB-6	C-strain	245±5	6613±3	NF	21.99±0.04	N/A
LBB-7	C-strain	262±15	7097.5±139.5	NF	22.27±0.01	N/A
LBB-8	C-strain	177±12	6749±15	NF	23.08±0.11	N/A
LBB-9	C-strain	221±1	6607±96	NF	22.87±0.09	N/A
MD-4	C-strain	129±18	6059±65	NF	26.02±0.01	N/A
MD-7	C-strain	116.5±15.5	6734.5±260.5	NF	24.01±0.02	N/A
MD-8	C-strain	112.65±24.35	6022±423	NF	25.36±0.1	N/A
MN-1	C-strain	161±17	6766.5±160.5	NF	21.84±0.05	N/A
MN-2	C-strain	160.5±7.5	6408±304	NF	22.07±0.07	N/A
MN-3	C-strain	288±7	7579±121	NF	21.54±0.02	N/A
MN-4	C-strain	243±13	7208±529	NF	21.94±0.14	N/A
MN-5	C-strain	234.5±16.5	7422.5±613.5	NF	23.06±0.08	N/A
MN-7	C-strain	229±1	6832.5±0.5	NF	22.58±0.05	N/A
MN-8	C-strain	225±6	6484±48	NF	22.86±0.02	N/A
NC-4	C-strain	238.5±2.5	7294.5±22.5	NF	24.88±0.12	N/A
NC-7	C-strain	227.5±4.5	6949±6	NF	23.72±0.02	N/A
NC-8	C-strain	179±15	6384.5±228.5	NF	28.26±0.05	N/A
SC-1	C-strain	182±16	7101.5±150.5	NF	24.46±0.03	N/A
SC-2	C-strain	203.5±0.5	6748.5±88.5	NF	23.98±0.02	N/A
SC-3	C-strain	175.5±13.5	6790±485	NF	24.62±0.11	N/A
SC-4	C-strain	244±10	6744.5±5.5	NF	23.16±0	N/A
SC-5	C-strain	186.5±15.5	6673±317	NF	22.98±0.08	N/A
SC-6	C-strain	210.5±16.5	6295±39	NF	23.55±0.03	N/A
SC-7	C-strain	152±6	6603±95	NF	25.09±0.02	N/A
SC-8	C-strain	205.5±3.5	6592±83	NF	23.65±0.04	N/A
CC-1	Heterozygote	6894.5±32.5	6260.5±26.5	23.86±0.05	23.15±0.03	0.71
CSTX-37	Heterozygote	6249±92	6956.5±50.5	24.19±0.01	23.5±0	0.69
FL-1	Heterozygote	4901±48	5944±6	27.47±0.03	26.64±0.01	0.83
FL-4	Heterozygote	5257.5±167.5	6510±207	26.96±0.05	26.12±0.06	0.84
FL-5	Heterozygote	5537.5±95.5	6588±102	27.3±0.09	26.56±0.1	0.74
MN-6	Heterozygote	6048.5±150.5	6320±196	24.55±0.08	24.15±0.08	0.4
