# Supplementary material for: Novel real-time PCR based assays for differentiating fall armyworm strains using four single nucleotide polymorphisms
Source: PeerJ. 2021 Sep 24;9:e12195. doi: 10.7717/peerj.12195 (PMC8475543; doi:10.7717/peerj.12195)
Supplement: Supplemental Information 5 — The R-strain allele is associated with the FAM-bound probe, while the C-strain allele is associated with the VIC-bound probe. All listed values were averaged across two technical replicates with SEM included. NF indicate that no flourescents was detected above the threshold for one or more technical replicates. Δ Cq could not be calculated when NF was recorded in either allele. [file peerj-09-12195-s005.xlsx]

## Sheet: Table_S5
Table S5. Real-time PCR data for SNP D including the RFUs detected and Cq value calculated for each flourophore. The R-strain allele is associated with the FAM-bound probe, while the C-strain allele is associated with the VIC-bound probe. All listed values were averaged across two technical replicates with SEM included. NF indicate that no flourescents was detected above the threshold for one or …
Sample	Allele Call	Mean FAM RFUs ± SEM	Mean VIC RFUs ± SEM	Mean FAM Cq ± SEM	Mean VIC Cq ± SEM	ΔCq
CC-2	R-strain	4506±321	3739±245	22.28±0.06	25.66±0.04	3.38
CC-3	R-strain	4197.5±49.5	3230±58	23.51±0.01	27.09±0.01	3.58
CSTX-1	R-strain	4118.5±61.5	3359±7	21.56±0.01	25.23±0.03	3.67
CSTX-11	R-strain	4036±180	3182±84	23.31±0.13	26.89±0.12	3.58
CSTX-12	R-strain	4056.5±304.5	3116±202	21.49±0.06	25.39±0.16	3.9
CSTX-18	R-strain	4004±5	3142.5±38.5	21.78±0.17	25.53±0.02	3.75
CSTX-2	R-strain	4059±108	3143.5±65.5	22.37±0.11	26.08±0.12	3.71
CSTX-21	R-strain	4286.5±41.5	3502±37	22.97±0.02	26.38±0.03	3.41
CSTX-23	R-strain	4694±88	4032±63	22.44±0.02	25.85±0.04	3.41
CSTX-24	R-strain	4229.5±57.5	3353±38	21.61±0.23	25.27±0.06	3.66
CSTX-29	R-strain	4037.5±119.5	3233.5±116.5	22.42±0.05	25.97±0.12	3.55
CSTX-3	R-strain	4151.5±197.5	3223.5±166.5	22.39±0.03	26.09±0.14	3.7
CSTX-32	R-strain	3755.5±125.5	2840±63	23.99±0.12	27.7±0.08	3.71
CSTX-35	R-strain	4212±351	3617±286	24.25±0.08	27.59±0.23	3.34
CSTX-38	R-strain	4216.5±70.5	3252.5±62.5	22.48±0.03	26.17±0.07	3.69
CSTX-39	R-strain	4123±12	3378±32	21.24±0.07	24.88±0.04	3.64
CSTX-4	R-strain	4032±86	3058.5±58.5	23.24±0.04	26.94±0.09	3.7
CSTX-40	R-strain	3774.5±94.5	2895.5±57.5	22.65±0.28	26.53±0.12	3.88
CSTX-5	R-strain	3644±13	2702.5±13.5	22.69±0	26.53±0.02	3.84
CSTX-6	R-strain	4642±46	3615±14	22.47±0.01	25.98±0.02	3.51
CSTX-7	R-strain	4690.5±90.5	3931.5±34.5	22.02±0.12	25.25±0	3.23
CSTX-8	R-strain	4509±143	3464±75	21.57±0.02	25.19±0.07	3.62
CSTX-9	R-strain	4427±86	3566.5±54.5	22.44±0.09	25.9±0.04	3.46
GA-1	R-strain	3772.5±137.5	2806.5±93.5	26.27±0.02	29.92±0.08	3.65
GA-10	R-strain	4216.5±5.5	2975.5±29.5	24.62±0.17	28.3±0	3.68
GA-2	R-strain	3955.5±365.5	2947±203	24.77±0.12	28.42±0.01	3.65
GA-3	R-strain	2974.5±47.5	2156.5±26.5	29.14±0.11	32.87±0.14	3.73
GA-4	R-strain	4131±149	3069±111	22.92±0.06	26.53±0.06	3.61
GA-5	R-strain	4024.5±124.5	3207.5±90.5	22.4±0.05	26.12±0.03	3.72
GA-6	R-strain	4088±160	3039.5±97.5	22.95±0.12	26.78±0.02	3.83
GA-7	R-strain	4138±165	3254±132	23.16±0	26.72±0.06	3.56
GA-8	R-strain	4069.5±189.5	3017±84	23.54±0.09	27.34±0.07	3.8
GA-9	R-strain	4031±1	2964±47	25.61±0.19	29.27±0.15	3.66
MD-1	R-strain	3892.5±95.5	2989±96	23.82±0.09	27.5±0.1	3.68
MD-2	R-strain	2847.5±78.5	1661±31	26.12±0.05	31.29±0.1	5.17
MD-3	R-strain	3251±86	2403±68	26.34±0.01	30.23±0.09	3.89
MD-5	R-strain	2687±127	1874.5±70.5	28.4±0.02	32.45±0	4.05
MD-6	R-strain	3285±192	2329.5±100.5	25.2±0.05	29.31±0.11	4.11
MD-9	R-strain	3799.5±75.5	2914±53	24.13±0.03	27.73±0.09	3.6
NC-1	R-strain	1856±22	1571±413	34.39±0.05	37.48±0.62	3.09
NC-2	R-strain	4093.5±239.5	3085±186	23.72±0.05	27.24±0.17	3.52
NC-3	R-strain	3379±46	2422.5±50.5	29.26±0.06	32.73±0.02	3.47
NC-5	R-strain	4349.5±53.5	3334±44	23.25±0.08	26.87±0.1	3.62
NC-6	R-strain	4334.5±407.5	3228±243	23.29±0.15	26.95±0.23	3.66
SC-10	R-strain	3769±52	2762.5±63.5	24.76±0.04	28.65±0.01	3.89
SC-9	R-strain	3927±37	2989.5±52.5	23.66±0.16	27.3±0.15	3.64
WES-1	R-strain	4339.5±89.5	3594±82	22.25±0.03	25.7±0.07	3.45
WES-2	R-strain	4013.5±32.5	3074.5±12.5	23.76±0.01	27.37±0	3.61
CC-4	C-strain	785.5±5.5	6046.5±127.5	28.62±0.38	23.19±0.03	5.43
CC-5	C-strain	786±38	5940±127	28.43±0.51	22.4±0.09	6.03
CSTX-10	C-strain	828.5±52.5	6186.5±62.5	28.7±0.63	23.25±0.03	5.45
CSTX-13	C-strain	819.5±35.5	6139.5±0.5	27.78±0.47	21.91±0.05	5.87
CSTX-14	C-strain	795±37	5753±70	27.85±0.21	22.11±0.03	5.74
CSTX-15	C-strain	850.5±29.5	6206.5±308.5	27.35±0.1	22.04±0.01	5.31
CSTX-16	C-strain	789±8	5895±116	28.25±0.2	22.43±0	5.82
CSTX-17	C-strain	814±22	6102.5±49.5	28.1±0.19	22.16±0.01	5.94
CSTX-19	C-strain	907.5±127.5	6295±478	27.35±0.88	22.14±0.11	5.21
CSTX-20	C-strain	805±46	6093±302	28.64±0.73	22.28±0.04	6.36
CSTX-22	C-strain	863.5±11.5	6511.5±325.5	28.3±0.27	22.11±0.17	6.19
CSTX-25	C-strain	829±22	6356.5±66.5	28.25±0.34	22.82±0.21	5.43
CSTX-26	C-strain	813±23	5814.5±113.5	27.89±0.4	22.3±0.02	5.59
CSTX-27	C-strain	786±53	6116±93	28.14±0.92	22.21±0.01	5.93
CSTX-28	C-strain	825.5±11.5	5913.5±117.5	28.01±0.29	22.45±0.04	5.56
CSTX-30	C-strain	745.5±1.5	5806±129	28.92±0.37	23.5±0.15	5.42
CSTX-31	C-strain	748±7	6070.5±82.5	28.42±0.1	22.19±0	6.23
CSTX-33	C-strain	771±14	5915.5±272.5	28.22±0.48	22.17±0.05	6.05
CSTX-34	C-strain	768±20	5778.5±93.5	28.37±0.75	22.27±0.04	6.1
CSTX-36	C-strain	779±36	5932±155	28.38±0.36	22.25±0.17	6.13
CSTX-41	C-strain	791±17	5798±11	27.83±0.42	22.42±0.11	5.41
CSTX-42	C-strain	778.5±43.5	5847.5±257.5	28.17±0.19	22.36±0.06	5.81
FL-1	C-strain	595±3	5930±67	31.72±0.1	26.36±0.02	5.36
FL-2	C-strain	686.5±9.5	5891±11	30.45±0.31	24.93±0.02	5.52
FL-3	C-strain	629.5±7.5	5595±247	31.1±0.31	24.95±0.07	6.15
FL-4	C-strain	648±19	6259.5±31.5	31.37±0.37	26.04±0.03	5.33
FL-5	C-strain	711±6	6219±157	30.78±0.19	25.81±0.01	4.97
FL-6	C-strain	740±17	6873.5±68.5	30.64±0.59	25.25±0.01	5.39
FL-8	C-strain	701±17	6767.5±121.5	31.51±0.28	26.37±0.01	5.14
FL-9	C-strain	798.5±16.5	6552.5±65.5	29.95±0.12	24.72±0.06	5.23
LBB-1	C-strain	902±49	6495.5±377.5	27.47±0.08	22.21±0.09	5.26
LBB-2	C-strain	846±25	6053.5±276.5	28.12±0.21	22.06±0.06	6.06
LBB-3	C-strain	841.5±57.5	6005.5±111.5	27.52±0.59	22.13±0.04	5.39
LBB-5	C-strain	739.5±42.5	5537±184	28.43±0.35	22.22±0.02	6.21
LBB-8	C-strain	732.5±12.5	5972.5±52.5	29.16±0.14	23.42±0.05	5.74
LBB-9	C-strain	689±13	5963±47	29.56±0.5	23.37±0.02	6.19
MD-4	C-strain	480.5±6.5	5478±112	32.82±0.45	26.27±0.05	6.55
MD-7	Allele 2	619±31	6281.5±243.5	29.99±0	23.69±0.08	6.3
MD-8	C-strain	483.5±31.5	6146±217	31.82±0.1	25.1±0.07	6.72
MN-1	C-strain	840±36	6351.5±64.5	28.04±0.48	22.31±0.01	5.73
MN-2	C-strain	880.5±20.5	6127.5±279.5	27.79±0.09	22.32±0.02	5.47
MN-3	C-strain	903±25	6918±72	28.11±0.01	22.03±0	6.08
MN-4	C-strain	922.5±51.5	6403±514	27.52±0.08	22.43±0.16	5.09
MN-5	C-strain	841.5±73.5	6750.5±441.5	28.45±0.46	22.58±0.12	5.87
MN-7	C-strain	765±4	6044±96	29.1±0.05	23.23±0.03	5.87
MN-8	C-strain	736.5±1.5	5799.5±13.5	28.92±0.03	23.36±0	5.56
NC-7	C-strain	686±2	6108±109	30.48±0.15	24.5±0.03	5.98
NC-8	C-strain	524.5±2.5	5734.5±223.5	33.58±0.1	28.62±0.12	4.96
SC-1	C-strain	670.5±3.5	6216±157	30.96±0.29	24.95±0.06	6.01
SC-2	C-strain	772.5±6.5	6638.5±245.5	30.07±0.23	24.17±0.01	5.9
SC-3	C-strain	740±5	6053±144	29.97±0.21	24.9±0	5.07
SC-4	C-strain	814.5±12.5	6111±21	28.69±0.13	23.31±0	5.38
SC-5	C-strain	686±40	5879±357	29.91±0.03	23.23±0.08	6.68
SC-6	C-strain	709±15	6047±46	30.34±0.09	23.76±0.06	6.58
SC-7	C-strain	660.5±10.5	5954.5±28.5	31.04±0.02	25.4±0.02	5.64
SC-8	C-strain	725.5±75.5	6020.5±192.5	30.51±1.08	24.03±0.05	6.48
CC-1	Heterozygote	3371±174	6403±350	22.72±0.05	23.27±0.05	0.55
CSTX-37	Heterozygote	2360.5±25.5	6546.5±92.5	24.7±0.02	23.79±0.01	0.91
FL-7	Heterozygote	2819.5±63.5	5824±133	25.98±0.18	26.48±0.09	0.5
LBB-4	Heterozygote	2322±64	5701.5±77.5	23.77±0.24	23.04±0.11	0.73
LBB-6	Heterozygote	2286.5±8.5	5723±15	24.04±0.01	23.19±0.02	0.85
LBB-7	Heterozygote	3186±16	6168.5±5.5	23.51±0.04	24.09±0	0.58
MN-6	Heterozygote	3066±179	5881.5±358.5	23.77±0.13	24.34±0.11	0.57
NC-4	Heterozygote	1860±105	6224.5±59.5	27.42±0.17	26.32±0.02	1.1
WES-3	No Call	186±26	36.75±0.65	38.6±2.22	NF	N/A
