# Supplementary material for: Novel real-time PCR based assays for differentiating fall armyworm strains using four single nucleotide polymorphisms
Source: PeerJ. 2021 Sep 24;9:e12195. doi: 10.7717/peerj.12195 (PMC8475543; doi:10.7717/peerj.12195)
Supplement: Supplemental Information 6 — The collection location for each individual is provided. If the strain was the same across at least 5 of 6 markers, then a consensus strain is provided. If discordance between markers was identified, but at least two markers identified the individual as a hybrid (H), then the consensus strain is listed as hybrid. [file peerj-09-12195-s006.xlsx]

## Sheet: Table_S6
Table S6. Strain calls for all individuals at six diagnostic markers (COI, Tpi, and SNP A-D). The collection location for each individual is provided. If the strain was the same across at least 5 of 6 markers, then a consensus strain is provided. If discordance between markers was identified, but at least two markers identified the individual as a hybrid (H), then the consensus strain is listed a…
Collection Location	Sample Names	COI	TPI	SNP A	SNP B	SNP C	SNP D	Consensus
Tifton, GA	GA-1	R	R	R	R	R	R	R
Tifton, GA	GA-2	R	R	R	R	R	R	R
Tifton, GA	GA-3	R	H	R	R	R	R	R
Tifton, GA	GA-4	R	R	R	R	R	R	R
Tifton, GA	GA-5	R	R	R	R	R	R	R
Tifton, GA	GA-6	R	R	R	R	R	R	R
Tifton, GA	GA-7	R	R	R	R	R	R	R
Tifton, GA	GA-8	R	R	R	R	R	R	R
Tifton, GA	GA-9	R	R	R	R	R	R	R
Tifton, GA	GA-10	R	R	R	R	R	R	R
Jarretsville, MD	MD - 1	R	R	R	R	R	R	R
Jarretsville, MD	MD - 2	R	R	R	R	R	R	R
Jarretsville, MD	MD - 3	R	C	R	R	R	R	R
Jarretsville, MD	MD - 4	C	C	C	C	C	C	C
Jarretsville, MD	MD - 5	R	R	R	R	R	R	R
Jarretsville, MD	MD - 6	R	R	R	R	R	R	R
Jarretsville, MD	MD - 7	C	C	C	C	C	C	C
Jarretsville, MD	MD - 8	R	C	C	C	C	C	C
Jarretsville, MD	MD - 9	R	R	R	R	R	R	R
Roper, NC	NC-1	R	R	R	R	R	R	R
Roper, NC	NC-2	R	R	R	R	R	R	R
Roper, NC	NC-3	R	R	R	R	R	R	R
Roper, NC	NC-4	C	C	C	C	C	H	C
Roper, NC	NC-5	R	R	R	R	R	R	R
Roper, NC	NC-6	R	R	R	R	R	R	R
Roper, NC	NC-7	C	C	C	C	C	C	C
Roper, NC	NC-8	C	R	C	C	C	C	C
Collier, FL	FL-1	C	C	C	C	H	C	C
Collier, FL	FL-2	C	C	C	C	C	C	C
Collier, FL	FL-3	C	C	C	C	C	C	C
Collier, FL	FL-4	C	C	C	C	H	C	C
Collier, FL	FL-5	C	C	C	C	H	C	C
Collier, FL	FL-6	C	C	C	C	C	C	C
Collier, FL	FL-7	C	C	C	H	R	H	H
Collier, FL	FL-8	C	C	C	C	C	C	C
Collier, FL	FL-9	C	C	C	C	C	C	C
Charleston, SC	SC-1	C	C	C	C	C	C	C
Charleston, SC	SC-2	C	C	C	C	C	C	C
Charleston, SC	SC-3	C	C	H	C	C	C	C
Charleston, SC	SC-4	C	C	C	C	C	C	C
Charleston, SC	SC-5	C	C	C	C	C	C	C
Charleston, SC	SC-6	C	C	C	C	C	C	C
Charleston, SC	SC-7	C	C	H	C	C	C	C
Charleston, SC	SC-8	C	C	C	C	C	C	C
Charleston, SC	SC-9	R	R	R	R	R	R	R
Charleston, SC	SC-10	R	R	R	R	R	R	R
Rosemount, MN	MN-1	C	C	C	C	C	C	C
Rosemount, MN	MN-2	C	C	C	C	C	C	C
Rosemount, MN	MN-3	C	C	C	C	C	C	C
Rosemount, MN	MN-4	C	C	C	C	C	C	C
Rosemount, MN	MN-5	C	C	C	C	C	C	C
Lubbock, TX	LBB-1	C	C	C	C	C	C	C
Lubbock, TX	LBB-2	C	C	C	C	C	C	C
Lubbock, TX	LBB-3	C	C	C	C	C	C	C
Lubbock, TX	LBB-4	C	C	C	C	C	H	C
Lubbock, TX	LBB-5	C	C	C	C	C	C	C
Lubbock, TX	LBB-6	C	C	C	C	C	H	C
College Station, TX	CSTX-1	R	R	R	R	R	R	R
College Station, TX	CSTX-2	R	R	R	R	R	R	R
College Station, TX	CSTX-3	R	R	R	R	R	R	R
College Station, TX	CSTX-4	R	R	R	R	R	R	R
College Station, TX	CSTX-5	R	R	R	R	R	R	R
College Station, TX	CSTX-6	R	R	R	R	R	R	R
College Station, TX	CSTX-7	R	H	R	R	R	R	R
College Station, TX	CSTX-8	R	R	R	R	R	R	R
College Station, TX	CSTX-9	R	R	R	R	R	R	R
College Station, TX	CSTX-10	R	R	R	R	R	C	R
College Station, TX	CSTX-11	R	R	R	R	R	R	R
College Station, TX	CSTX-12	R	H	R	R	R	R	R
College Station, TX	CSTX-13	C	C	C	C	C	C	C
College Station, TX	CSTX-14	C	C	C	C	C	C	C
College Station, TX	CSTX-15	C	C	C	C	C	C	C
College Station, TX	CSTX-16	C	C	C	C	C	C	C
College Station, TX	CSTX-17	C	C	C	H	C	C	C
College Station, TX	CSTX-18	R	R	R	R	R	R	R
College Station, TX	CSTX-19	C	C	C	C	C	C	C
College Station, TX	CSTX-20	C	C	C	C	C	C	C
College Station, TX	CSTX-21	R	R	R	R	R	R	R
College Station, TX	CSTX-22	C	C	C	C	C	C	C
College Station, TX	CSTX-23	R	R	R	R	R	R	R
College Station, TX	CSTX-24	R	R	R	R	R	R	R
College Station, TX	CSTX-25	C	C	C	C	C	C	C
College Station, TX	CSTX-26	C	C	C	C	C	C	C
College Station, TX	CSTX-27	C	C	C	C	C	C	C
College Station, TX	CSTX-28	C	C	C	C	C	C	C
College Station, TX	CSTX-29	R	C	R	R	R	R	R
College Station, TX	CSTX-30	C	C	C	C	C	C	C
College Station, TX	CSTX-31	C	H	C	C	C	C	C
College Station, TX	CSTX-32	R	R	R	R	R	R	R
College Station, TX	CSTX-33	C	C	C	C	C	C	C
College Station, TX	CSTX-34	C	C	C	C	C	C	C
College Station, TX	CSTX-35	R	R	R	R	R	R	R
College Station, TX	CSTX-36	C	C	C	C	C	C	C
Corpus Christi, TX	CC-1	R	H	H	H	H	H	H
Lubbock, TX	LBB-7	R	H	H	C	C	H	H
College Station, TX	CSTX-37	R	H	H	C	H	H	H
Rosemount, MN	MN-6	R	H	H	H	H	H	H
Corpus Christi, TX	CC-2	R	R	R	R	R	R	R
Corpus Christi, TX	CC-3	R	R	R	R	R	R	R
Weslaco, TX	WES-1	R	R	R	R	R	R	R
Weslaco, TX	WES-2	R	R	R	R	R	R	R
Weslaco, TX	WES-3	R	R	R	R	R	No Call	R
College Station, TX	CSTX-38	R	R	R	R	R	R	R
College Station, TX	CSTX-39	R	R	R	R	R	R	R
College Station, TX	CSTX-40	R	R	R	C	R	R	R
Rosemount, MN	MN-7	C	C	C	C	C	C	C
Rosemount, MN	MN-8	C	C	C	C	C	C	C
Lubbock, TX	LBB-8	C	C	C	C	C	C	C
Lubbock, TX	LBB-9	C	C	C	C	C	C	C
College Station, TX	CSTX-41	C	C	C	C	C	C	C
College Station, TX	CSTX-42	C	C	C	C	C	C	C
Corpus Christi, TX	CC-4	C	C	C	C	C	C	C
Corpus Christi, TX	CC-5	C	C	C	C	C	C	C
