# Supplementary material for: Novel real-time PCR based assays for differentiating fall armyworm strains using four single nucleotide polymorphisms
Source: PeerJ. 2021 Sep 24;9:e12195. doi: 10.7717/peerj.12195 (PMC8475543; doi:10.7717/peerj.12195)
Supplement: Supplemental Information 7 — There are four possible results; “C” indicates C-strain, “R” indicates R-strain, “H” indicates putative hybrid, and “Inconclusive” indicates that the qPCR results did not meet the minimum criteria for strain determination. Prior to using this formula, the colored text must be replaced with the cell location containing the coresponding information. These formulas require that a zero be recorded as the fluorophore Cq value is no flourescents is detected above the threshold. Additionally, the Δ Cq value must be positive. [file peerj-09-12195-s007.xlsx]

## Sheet: Sheet1
Table S7. Excel formulas that can be used to rapidly determine the strain of a sample after inputting qPCR data. There are four possible results; "C" indicates C-strain, "R" indicates R-strain, "H" indicates putative hybrid, and "Inconclusive" indicates that the qPCR results did not meet the minimum criteria for strain determination. Prior to using this formula, the colored text must be replaced …
SNP Name	Excel Formula1
SNP A	=IF(AND(VIC_Cq>0,Delta_Cq>5),"C",IF(AND(VIC_Cq>0,Delta_Cq>0, Delta_Cq<2),"H",IF(AND(VIC_Cq=0,FAM_Cq>10,FAM_Cq<32),"R","Inconclusive")))
SNP B	=IF(AND(VIC_Cq<30,VIC_Cq>0,Delta_Cq>2),"C",IF(AND(VIC_Cq<30,VIC_Cq>0,Delta_Cq<2),"H",IF(AND(VIC_Cq>30,FAM_Cq<VIC_Cq,FAM_Cq<>0,Delta_Cq>4),"R","Inconclusive")))
SNP C	=IF(AND(FAM_Cq>0,Delta_Cq>8),"R",IF(AND(FAM_Cq>0,Delta_Cq>0,Delta_Cq<1),"H",IF(AND(FAM_Cq=0,VIC_Cq>10,VIC_Cq<32),"C","Inconclusive")))
SNP D	=IF(AND(VIC_Cq>FAM_Cq,Delta_Cq>3),"R",IF(AND(VIC_Cq>FAM_Cq,Delta_Cq<1),"H",IF(AND(FAM_Cq>VIC_Cq,Delta_Cq>4),"C",IF(AND(FAM_Cq>VIC_Cq,Delta_Cq<1.5),"H","Inconclusive"))))
	IUser may need to alter the cutoff values for strain assignment based on machine sensitivity.
