# Supplementary material for: Novel real-time PCR based assays for differentiating fall armyworm strains using four single nucleotide polymorphisms
Source: PeerJ. 2021 Sep 24;9:e12195. doi: 10.7717/peerj.12195 (PMC8475543; doi:10.7717/peerj.12195)
Supplement: Supplemental Information 8 — All base pair positions are based on the Liu et al. (2019) chromosome map. [file peerj-09-12195-s008.xlsx]

## Sheet: Table_S8
Table S8. Relative position of the Tpi gene compared to the three SNP markers on the Z-chromosome. All base pair positions are based on the Liu et al. (2019) chromosome map.
SNP Locus	Position on the Z-chromosome
SNP C	4683787
SNP B	4933322
Tpi	8312826
SNP A	14104488
