# Supplementary material for: Novel real-time PCR based assays for differentiating fall armyworm strains using four single nucleotide polymorphisms
Source: PeerJ. 2021 Sep 24;9:e12195. doi: 10.7717/peerj.12195 (PMC8475543; doi:10.7717/peerj.12195)
Supplement: Supplemental Information 14 — Each excel tab contains the data from a different SNP based TaqMan assay (SNP A-D). Sample names indicate unique biological replicates. Every Cq value is averaged across two technical replicates. N/A indicates that no fluorescent signal was detected in at least one of the technical replicates. [file peerj-09-12195-s014.xlsx]

## Sheet: SNP A
Fluor	Sample	Cq Mean	Cq Std. Dev	DNA Conectration	Log[DNA]
FAM	MN8	20.59	0.418	100	2
FAM	MN15	21.25	0.077	100	2
FAM	LB2	20.69	0.625	100	2
FAM	MN8	24.16	0.452	10	1
FAM	MN15	24.63	0.276	10	1
FAM	LB2	24.32	0.094	10	1
FAM	MN8	27.7	1.637	1	0
FAM	MN15	27.59	0.181	1	0
FAM	LB2	27.3	0.15	1	0
FAM	MN8	30.31	0.372	0.1	-1
FAM	MN15	30.89	0.459	0.1	-1
FAM	LB2	30.01	0.474	0.1	-1
FAM	MN8	33.75	0.022	0.01	-2
FAM	MN15	33.69	0.691	0.01	-2
FAM	LB2	33.29	0.125	0.01	-2
FAM	MN8	36.88	0.937	0.001	-3
FAM	MN15	37.15	1.465	0.001	-3
FAM	LB2	37.08	0.645	0.001	-3
FAM	MN8	N/A	N/A	0.0001	-4
FAM	MN15	N/A	N/A	0.0001	-4
FAM	LB2	N/A	N/A	0.0001	-4
FAM	MN8	N/A	N/A	NTC	NTC
FAM	MN15	N/A	N/A	NTC	NTC
FAM	LB2	N/A	N/A	NTC	NTC
VIC	W2	24.19	0	100	2
VIC	W16	25.33	0.107	100	2
VIC	W17	24.65	0.372	100	2
VIC	W2	27.57	0.203	10	1
VIC	W16	27.51	1.164	10	1
VIC	W17	27.49	0.34	10	1
VIC	W2	30.65	0.108	1	0
VIC	W16	30.78	0.48	1	0
VIC	W17	30.91	0.163	1	0
VIC	W2	32.85	1.279	0.1	-1
VIC	W16	34.3	0.097	0.1	-1
VIC	W17	34.63	0.548	0.1	-1
VIC	W2	36.14	0.074	0.01	-2
VIC	W16	37.45	1.05	0.01	-2
VIC	W17	36.41	0.602	0.01	-2
VIC	W2	N/A	N/A	0.001	-3
VIC	W16	N/A	N/A	0.001	-3
VIC	W17	N/A	N/A	0.001	-3
VIC	W2	N/A	N/A	0.0001	-4
VIC	W16	N/A	N/A	0.0001	-4
VIC	W17	N/A	N/A	0.0001	-4
VIC	W2	N/A	N/A	NTC	NTC
VIC	W16	N/A	N/A	NTC	NTC
VIC	W17	N/A	N/A	NTC	NTC

## Sheet: SNP B
Fluor	Sample	Cq Mean	Cq Std. Dev	DNA Conectration	Log[DNA]
FAM	MN8	21.03	0.547	100	2
FAM	MN15	20.82	0.184	100	2
FAM	LB2	20.96	0.081	100	2
FAM	MN8	24.45	0.365	10	1
FAM	MN15	24.95	0.423	10	1
FAM	LB2	24.61	0.152	10	1
FAM	MN8	27.43	0.363	1	0
FAM	MN15	28.09	0.407	1	0
FAM	LB2	27.17	0.238	1	0
FAM	MN8	30.92	0.079	0.1	-1
FAM	MN15	30.91	0.183	0.1	-1
FAM	LB2	30.25	0.05	0.1	-1
FAM	MN8	33.77	0.37	0.01	-2
FAM	MN15	33.58	0.013	0.01	-2
FAM	LB2	33.75	0.231	0.01	-2
FAM	MN8	36.17	0.055	0.001	-3
FAM	MN15	N/A	N/A	0.001	-3
FAM	LB2	37.74	0.47	0.001	-3
FAM	MN8	N/A	N/A	0.0001	-4
FAM	MN15	N/A	N/A	0.0001	-4
FAM	LB2	N/A	N/A	0.0001	-4
FAM	MN8	N/A	N/A	NTC	NTC
FAM	MN15	N/A	N/A	NTC	NTC
FAM	LB2	N/A	N/A	NTC	NTC
VIC	W2	22.99	0.067	100	2
VIC	W16	24.63	0.407	100	2
VIC	W17	23.05	0.092	100	2
VIC	W2	26.19	0.074	10	1
VIC	W16	28.31	0.181	10	1
VIC	W17	26.3	0.069	10	1
VIC	W2	29.47	1.147	1	0
VIC	W16	30.82	0.123	1	0
VIC	W17	29.29	0.108	1	0
VIC	W2	32.5	0.812	0.1	-1
VIC	W16	33.89	0.138	0.1	-1
VIC	W17	32.22	0.317	0.1	-1
VIC	W2	35.24	0.255	0.01	-2
VIC	W16	37.3	0.162	0.01	-2
VIC	W17	35.67	0.199	0.01	-2
VIC	W2	N/A	N/A	0.001	-3
VIC	W16	N/A	N/A	0.001	-3
VIC	W17	37.3	0.106	0.001	-3
VIC	W2	N/A	N/A	0.0001	-4
VIC	W16	N/A	N/A	0.0001	-4
VIC	W17	N/A	N/A	0.0001	-4
VIC	W2	N/A	N/A	NTC	NTC
VIC	W16	N/A	N/A	NTC	NTC
VIC	W17	N/A	N/A	NTC	NTC

## Sheet: SNP C
Fluor	Sample	Cq Mean	Cq Std. Dev	DNA Conectration	Log[DNA]
FAM	MN8	20.74	0.6	100	2
FAM	MN15	20.88	0.026	100	2
FAM	LB2	20.66	0.134	100	2
FAM	MN8	24.47	0.28	10	1
FAM	MN15	24.31	0.147	10	1
FAM	LB2	23.88	0.065	10	1
FAM	MN8	26.93	0.108	1	0
FAM	MN15	27.25	0.016	1	0
FAM	LB2	26.71	0.055	1	0
FAM	MN8	29.8	0.009	0.1	-1
FAM	MN15	30.38	0.095	0.1	-1
FAM	LB2	29.82	0.131	0.1	-1
FAM	MN8	33.5	0.548	0.01	-2
FAM	MN15	33.72	1.006	0.01	-2
FAM	LB2	33.1	0.238	0.01	-2
FAM	MN8	35.91	0.98	0.001	-3
FAM	MN15	N/A	N/A	0.001	-3
FAM	LB2	35.99	1.098	0.001	-3
FAM	MN8	N/A	N/A	0.0001	-4
FAM	MN15	N/A	N/A	0.0001	-4
FAM	LB2	N/A	N/A	0.0001	-4
FAM	MN8	N/A	N/A	NTC	NTC
FAM	MN15	N/A	N/A	NTC	NTC
FAM	LB2	N/A	N/A	NTC	NTC
VIC	W2	21.68	0.062	100	2
VIC	W16	23.33	0.153	100	2
VIC	W17	26.37	1.162	100	2
VIC	W2	25.92	0.554	1	1
VIC	W16	26.87	0.107	10	1
VIC	W17	27.53	0.502	10	1
VIC	W2	28.31	0.015	0.1	0
VIC	W16	29.35	0.119	1	0
VIC	W17	30.67	0.041	1	0
VIC	W2	31.35	0.013	0.01	-1
VIC	W16	32.77	0.388	0.1	-1
VIC	W17	33.38	0.749	0.1	-1
VIC	W2	34.93	1.082	0.001	-2
VIC	W16	37.19	0.443	0.01	-2
VIC	W17	38.28	1.026	0.01	-2
VIC	W2	N/A	N/A	0.0001	-3
VIC	W16	N/A	N/A	0.001	-3
VIC	W17	N/A	N/A	0.001	-3
VIC	W2	N/A	N/A	1e-05	-4
VIC	W16	N/A	N/A	0.0001	-4
VIC	W17	N/A	N/A	0.0001	-4
VIC	W2	N/A	N/A	NTC	NTC
VIC	W16	N/A	N/A	NTC	NTC
VIC	W17	N/A	N/A	NTC	NTC

## Sheet: SNP D
Fluor	Sample	Cq Mean	Cq Std. Dev	DNA Conectration	Log[DNA]
FAM	MN8	20.59	0.119	100	2
FAM	MN15	20.71	0.025	100	2
FAM	LB2	20.5	0.339	100	2
FAM	MN8	24.05	0.439	10	1
FAM	MN15	23.96	0.517	10	1
FAM	LB2	24.15	0.319	10	1
FAM	MN8	26.68	0.049	1	0
FAM	MN15	27.34	0.244	1	0
FAM	LB2	26.59	0.09	1	0
FAM	MN8	30.09	0.263	0.1	-1
FAM	MN15	30.44	0.05	0.1	-1
FAM	LB2	29.54	0.048	0.1	-1
FAM	MN8	33.18	0.511	0.01	-2
FAM	MN15	33.04	0.207	0.01	-2
FAM	LB2	33.27	0.081	0.01	-2
FAM	MN8	36.17	0.482	0.001	-3
FAM	MN15	N/A	N/A	0.001	-3
FAM	LB2	35.13	0.49	0.001	-3
FAM	MN8	N/A	N/A	0.0001	-4
FAM	MN15	N/A	N/A	0.0001	-4
FAM	LB2	N/A	N/A	0.0001	-4
FAM	MN8	N/A	N/A	NTC	NTC
FAM	MN15	N/A	N/A	NTC	NTC
FAM	LB2	N/A	N/A	NTC	NTC
VIC	W2	20.18	0.033	100	2
VIC	W16	21.66	0.049	100	2
VIC	W2	23.77	0.085	10	1
VIC	W16	25.77	0.391	10	1
VIC	W2	26.6	0.046	1	0
VIC	W16	28.33	0.061	1	0
VIC	W2	30.01	0.077	0.1	-1
VIC	W16	31.99	0.247	0.1	-1
VIC	W2	32.71	0.378	0.01	-2
VIC	W16	36.64	2.467	0.01	-2
VIC	W2	N/A	N/A	0.001	-3
VIC	W16	40.21	0.347	0.001	-3
VIC	W2	N/A	N/A	0.0001	-4
VIC	W16	N/A	N/A	0.0001	-4
VIC	W2	N/A	N/A	NTC	NTC
VIC	W16	N/A	N/A	NTC	NTC
